# Supplementary material for: Oxidative Stress and Inflammatory Biomarkers for Populations with Occupational Exposure to Nanomaterials: A Systematic Review and Meta-Analysis
Source: MDPI journal article supplement (doi:10.3390/antiox11112182), 2022-11-04
Supplement: s1 [file s1]

**Table S2. Subgroup analysis for oxidative stress biomarkers**

|              | Variables     |                      | No.                  | SMD       | 95%CI       | $p_A$ -Value | I <sup>2</sup> | $p_H$ -Value | Model  |   |
|--------------|---------------|----------------------|----------------------|-----------|-------------|--------------|----------------|--------------|--------|---|
| MDA          | NM            | SiO <sub>2</sub> NPs | 1                    | 0.56      | −0.45,1.58  | 0.279        | -              | -            | R      |   |
|              |               | Graphene             | 1                    | −0.12     | −1.12,0.88  | 0.812        | -              | -            | R      |   |
|              |               | IONPs                | 1                    | 3.48      | 2.28,4.69   | <0.001       | -              | -            | R      |   |
|              |               | TiO <sub>2</sub> NPs | 7                    | 2.72      | 1.71,3.74   | <0.001       | 93.2           | <0.001       | R      |   |
|              |               | Mixed NMs            | 20                   | 2.20      | 1.22,3.18   | <0.001       | 96.4           | <0.001       | R      |   |
|              |               | MWCNTs               | 1                    | 1.58      | 0.23,2.93   | 0.022        | -              | -            | R      |   |
|              | Sample source | EBC                  | 17                   | 2.58      | 1.53,3.63   | <0.001       | 94.9           | <0.001       | R      |   |
|              |               | Blood                | 8                    | 3.33      | 1.86,4.79   | <0.001       | 96.9           | <0.001       | R      |   |
|              |               | Urine                | 6                    | −0.16     | −0.75,0.42  | 0.584        | 79.8           | <0.001       | R      |   |
| SOD          | NM            | Mixed NMs            | 14                   | −0.06     | −0.22,0.10  | 0.436        | 66.3           | <0.001       | R      |   |
|              |               | TiO <sub>2</sub> NPs | 3                    | −0.59     | −1.01,−0.18 | 0.005        | 73.4           | 0.023        | R      |   |
|              |               | SiO <sub>2</sub> NPs | 1                    | −0.48     | −0.85,−0.10 | 0.012        | -              | -            | R      |   |
|              |               | ITONPs               | 1                    | −1.45     | −1.82,−1.09 | <0.001       | -              | -            | R      |   |
| GPx          | NM            | SiO <sub>2</sub> NPs | 1                    | −0.90     | −1.29,−0.52 | <0.001       | -              | -            | R      |   |
|              |               | ITONPs               | 1                    | −1.37     | −1.73,−1.01 | <0.001       | -              | -            | R      |   |
|              |               | TiO <sub>2</sub> NPs | 1                    | −0.85     | −1.26,−0.43 | <0.001       | -              | -            | R      |   |
|              |               | Mixed NMs            | 14                   | −0.17     | −0.33,−0.01 | 0.035        | 65.1           | <0.001       | R      |   |
| HNE          | NM            | SiO <sub>2</sub> NPs | 1                    | 0.60      | −0.42,1.62  | 0.246        | -              | -            | R      |   |
|              |               | Graphene             | 1                    | 0.00      | −1.00,1.00  | 1.000        | -              | -            | R      |   |
|              |               | IONPs                | 1                    | 4.24      | 2.87,5.61   | <0.001       | -              | -            | R      |   |
|              |               | TiO <sub>2</sub> NPs | 5                    | 4.55      | 2.67,6.43   | <0.001       | 92.0           | <0.001       | R      |   |
|              |               | Mixed NMs            | 9                    | 0.84      | 0.25,1.43   | 0.005        | 73.3           | <0.001       | R      |   |
|              | Sample source | EBC                  | 10                   | 2.73      | 1.17,4.29   | 0.001        | 95.9           | <0.001       | R      |   |
|              |               | Urine                | 7                    | 1.12      | 0.74,1.51   | <0.001       | 0.0            | 0.995        | F      |   |
|              | HHE           | NM                   | IONPs                | 1         | 7.91        | 5.64,0.19    | <0.001         | -            | -      | R |
|              |               |                      | TiO <sub>2</sub> NPs | 5         | 5.99        | 2.30,9.69    | 0.001          | 97.2         | <0.001 | R |
| Mixed NMs    |               |                      | 2                    | 0.04      | −0.90,0.98  | 0.934        | 76.4           | 0.040        | R      |   |
| MWCNTs       |               |                      | 1                    | 1.39      | 0.08,2.70   | 0.038        | -              | -            | R      |   |
| 8-Isprostane | NM            | SiO <sub>2</sub> NPs | 3                    | 0.39      | 0.09,0.70   | 0.012        | 0.0            | 0.848        | F      |   |
|              |               | Graphene             | 1                    | −0.69     | −1.72,0.33  | 0.186        | -              | -            | R      |   |
|              |               | CNT                  | 1                    | 0.69      | 0.20,1.18   | 0.006        | -              | -            | R      |   |
|              |               | TiO <sub>2</sub> NPs | 7                    | 2.37      | 1.04,3.70   | <0.001       | 95.4           | <0.001       | R      |   |
|              |               | Mixed NMs            | 13                   | 0.74      | 0.41,1.06   | <0.001       | 72.7           | <0.001       | R      |   |
|              |               | ITONPs               | 1                    | 1.74      | 1.20,2.29   | <0.001       | -              | -            | R      |   |
|              | Sample source | EBC                  | 16                   | 1.17      | 0.64,1.69   | <0.001       | 93.0           | <0.001       | R      |   |
| 8-isoPGF2a   | NM            | Urine                | 10                   | 1.00      | 0.62,1.39   | <0.001       | 58.6           | 0.010        | R      |   |
|              |               | CNT                  | 2                    | 0.66      | 0.32,1.01   | <0.001       | 0.0            | 0.328        | F      |   |
|              |               | TiO <sub>2</sub> NPs | 2                    | 0.70      | 0.37,1.03   | <0.001       | 11.5           | 0.288        | F      |   |
|              |               | SiO <sub>2</sub> NPs | 2                    | 0.60      | 0.28,0.91   | <0.001       | 0.0            | 0.698        | F      |   |
|              |               | Mixed NMs            | 28                   | 1.35      | 0.88,1.82   | <0.001       | 95.3           | <0.001       | R      |   |
|              | IONPs         | 1                    | 3.36                 | 2.18,4.53 | <0.001      | -            | -              | R            |        |   |
|              | Sample        | EBC                  | 20                   | 1.25      | 0.81,1.69   | <0.001       | 94.3           | <0.001       | R      |   |

|           |        |                      |    |       |             |        |      |        |   |
|-----------|--------|----------------------|----|-------|-------------|--------|------|--------|---|
| 8-OHdG    | source | Urine                | 9  | 0.35  | -0.33,1.02  | 0.315  | 91.4 | <0.001 | R |
|           |        | Blood                | 6  | 2.74  | 0.56,4.93   | 0.014  | 97.2 | <0.001 | R |
|           | NM     | SiO <sub>2</sub> NPs | 6  | 0.53  | 0.16,0.91   | 0.005  | 74.2 | 0.002  | R |
|           | type   | Graphene             | 1  | -0.29 | -1.29,0.71  | 0.568  | -    | -      | R |
|           |        | Mixed NMs            | 55 | 0.92  | 0.69,1.16   | <0.001 | 92.4 | <0.001 | R |
|           |        | ITONPs               | 5  | 1.92  | 1.22,2.62   | <0.001 | 91.8 | <0.001 | R |
|           |        | IONPs                | 2  | 3.46  | -3.39,10.31 | 0.322  | 97.6 | <0.001 | R |
|           |        | TiO <sub>2</sub> NPs | 6  | 1.00  | 0.42,1.59   | 0.001  | 88.3 | <0.001 | R |
| 8-OHG     | Sample | EBC                  | 10 | 4.13  | 2.73,5.53   | <0.001 | 89.5 | <0.001 | R |
|           | source | Urine                | 35 | 0.67  | 0.42,0.93   | <0.001 | 93.0 | <0.001 | R |
|           |        | Blood                | 30 | 0.65  | 0.36,0.95   | <0.001 | 94.5 | <0.001 | R |
|           | NM     | IONPs                | 1  | 7.23  | 5.13,9.34   | <0.001 | -    | -      | R |
|           | type   | Mixed NMs            | 27 | 2.30  | 1.58,3.03   | <0.001 | 94.4 | <0.001 | R |
|           |        | TiO <sub>2</sub> NPs | 5  | 5.71  | 4.31,7.12   | <0.001 | 81.0 | <0.001 | R |
|           | Sample | EBC                  | 14 | 4.60  | 2.92,6.27   | <0.001 | 97.0 | <0.001 | R |
|           | source | Urine                | 13 | 1.19  | 0.49,1.89   | 0.001  | 88.1 | <0.001 | R |
| 3-ClTyr   |        | Blood                | 6  | 3.49  | 1.84,5.14   | <0.001 | 94.7 | <0.001 | R |
|           | NM     | IONPs                | 1  | 4.17  | 2.82,5.25   | <0.001 | -    | -      | R |
|           | type   | TiO <sub>2</sub> NPs | 5  | 5.79  | 3.63,7.95   | <0.001 | 92.0 | <0.001 | R |
|           |        | Mixed NMs            | 2  | 1.06  | 0.58,1.54   | <0.001 | 0.0  | 0.969  | F |
|           |        |                      |    |       |             |        |      |        |   |
| 5-OHMeU   | NM     | IONPs                | 1  | 4.52  | 3.08,5.95   | <0.001 | -    | -      | R |
|           | type   | Mixed NMs            | 27 | 1.55  | 0.85,2.25   | <0.001 | 94.6 | <0.001 | R |
|           |        | TiO <sub>2</sub> NPs | 5  | 3.23  | 1.79,4.67   | <0.001 | 89.5 | <0.001 | R |
|           | Sample | EBC                  | 14 | 3.10  | 1.87,4.33   | <0.001 | 95.5 | <0.001 | R |
|           | source | Urine                | 13 | 0.37  | -0.33,1.08  | 0.299  | 89.3 | <0.001 | R |
| o-Tyr     |        | Blood                | 6  | 2.66  | 0.92,4.40   | 0.003  | 96.0 | <0.001 | R |
|           | NM     | IONPs                | 1  | 4.53  | 3.10,5.97   | <0.001 | -    | -      | R |
|           | type   | Mixed NMs            | 27 | 1.47  | 0.85,2.09   | <0.001 | 93.4 | <0.001 | R |
|           |        | TiO <sub>2</sub> NPs | 5  | 3.10  | 2.14,4.06   | <0.001 | 77.6 | 0.001  | R |
|           | Sample | EBC                  | 14 | 2.80  | 1.91,3.69   | <0.001 | 92.5 | <0.001 | R |
| 3-NOTyr   | source | Urine                | 13 | 0.44  | -0.11,0.99  | 0.119  | 83.3 | <0.001 | R |
|           |        | Blood                | 6  | 2.76  | 0.68,4.84   | 0.009  | 96.9 | <0.001 | R |
|           | NM     | IONPs                | 1  | 4.81  | 3.31,6.31   | <0.001 | -    | -      | R |
|           | type   | Mixed NMs            | 5  | 4.01  | 2.77,5.26   | <0.001 | 83.3 | <0.001 | R |
|           |        | TiO <sub>2</sub> NPs | 20 | 2.17  | 1.21,3.14   | <0.001 | 96.2 | <0.001 | R |
| Aldehydes | Sample | EBC                  | 14 | 3.40  | 2.07,4.74   | <0.001 | 96.1 | <0.001 | R |
|           | source | Blood                | 6  | 2.21  | 0.15,4.28   | 0.036  | 96.9 | <0.001 | R |
|           |        | Urine                | 6  | 1.36  | -0.19,2.90  | 0.086  | 95.7 | <0.001 | R |
|           | NM     | IONPs                | 7  | 4.08  | 2.46,5.70   | <0.001 | 91.3 | <0.001 | R |
|           | type   | TiO <sub>2</sub> NPs | 35 | 3.63  | 2.91,4.36   | <0.001 | 94.0 | <0.001 | R |
| C6-12     |        | Mixed NMs            | 18 | 2.86  | 1.54,4.17   | <0.001 | 97.2 | <0.001 | R |
|           | Sample | EBC                  | 48 | 3.66  | 3.02,4.30   | <0.001 | 94.4 | <0.001 | R |
|           | source | Blood                | 6  | 4.89  | 1.08,8.71   | 0.012  | 98.1 | <0.001 | R |
|           |        | Urine                | 6  | 0.84  | -0.67,2.35  | 0.274  | 95.8 | <0.001 | R |

NMs, nanomaterials; NPs, nanoparticles; SiO<sub>2</sub>NPs, silica oxide nanoparticles; IONPs, iron oxide nanoparticles; TiO<sub>2</sub>NPs, titanium dioxide nanoparticles; ITONPs, indium tin oxide nanoparticles; MWCNTs, multi-walled carbon nanotubes; EBC, exhaled breath condensate; MDA, malonaldehyde; SOD, superoxide dismutase; GPx, glutathione peroxidase; HNE, 4-hydroxy-2-nonenal; HHE, 4-hydroxy-trans-hexenal; 8-OHdG, 8-hydroxydeoxyguanosine; 8-OHG, 8-hydroxyguanine; 8-isoPGF<sub>2</sub> $\alpha$ , 8-isoProstaglandin F<sub>2</sub> $\alpha$ ; 5-OHMeU, hydroxymethyl uracil; o-Tyr, o-tyrosine; 3-ClTyr, 3-chlorotyrosine; 3-NOTyr, nitrotyrosine; SMD, standardized mean difference; CI, confidence interval; F, fixed-effects; R, random-effects; *p*<sub>H</sub>-Value, significance for heterogeneity; *p*<sub>A</sub>-Value, significance for associations.
