# Supplementary material for: Oxidative Stress and Inflammatory Biomarkers for Populations with Occupational Exposure to Nanomaterials: A Systematic Review and Meta-Analysis
Source: MDPI journal article supplement (doi:10.3390/antiox11112182), 2022-11-04
Supplement: s1 [file s1]

Table S3. Subgroup analysis for inflammatory biomarkers

|              | Variables     |                      | No. | SMD   | 95%CI       | $p_A$ -Value | I <sup>2</sup> | $p_H$ -Value | Model |
|--------------|---------------|----------------------|-----|-------|-------------|--------------|----------------|--------------|-------|
| FENO         | NM type       | SiO <sub>2</sub> NPs | 1   | 0.45  | −0.55,1.46  | 0.379        | -              | -            | R     |
|              |               | Graphene             | 1   | 0.40  | −0.60,1.41  | 0.432        | -              | -            | R     |
|              |               | Mixed NMs            | 12  | 0.07  | −0.09,0.24  | 0.373        | 53.0           | 0.016        | R     |
|              |               | TiO <sub>2</sub> NPs | 3   | 2.58  | 1.26,3.90   | <0.001       | 85.7           | 0.001        | R     |
| IL-1 $\beta$ | NM type       | Carbon black         | 2   | 1.12  | 0.90,1.34   | <0.001       | 0.0            | 0.941        | F     |
|              |               | NPs                  |     |       |             |              |                |              |       |
|              |               | TiO <sub>2</sub> NPs | 1   | 0.05  | −0.26,0.35  | 0.766        | -              | -            | F     |
|              | Sample source | MWCNTs               | 2   | 4.97  | 1.58,8.37   | 0.004        | 84.9           | 0.010        | R     |
|              |               | Blood                | 4   | 1.17  | 0.40,1.93   | 0.003        | 93.5           | <0.001       | R     |
|              |               | Sputum               | 1   | 6.84  | 4.56,9.12   | <0.001       | -              | -            | R     |
| IL-4         | NM type       | Mixed NMs            | 2   | 0.07  | −0.37,0.50  | 0.765        | 0.0            | 0.944        | F     |
|              |               | MWCNTs               | 2   | 4.66  | 2.64,6.68   | <0.001       | 63.7           | 0.097        | R     |
|              | Sample source | EBC                  | 2   | 0.07  | −0.37,0.50  | 0.765        | 0.0            | 0.944        | F     |
|              |               | Sputum               | 1   | 5.81  | 3.83,7.80   | <0.001       | -              | -            | F     |
|              |               | Blood                | 1   | 3.74  | 2.31,5.17   | <0.001       | -              | -            | F     |
|              |               |                      |     |       |             |              |                |              |       |
| IL-5         | NM type       | MWCNTs               | 2   | 3.08  | 0.94,5.22   | 0.005        | 80.7           | 0.023        | R     |
|              |               | Mixed NMs            | 2   | 0.03  | −0.41,0.46  | 0.903        | 0.0            | 0.900        | F     |
|              | Sample source | Sputum               | 1   | 4.25  | 2.69,5.82   | <0.001       | -              | -            | F     |
|              |               | Blood                | 1   | 2.06  | 1.01,3.12   | <0.001       | -              | -            | F     |
|              |               | EBC                  | 2   | 0.03  | −0.41,0.46  | 0.903        | 0.0            | 0.900        | F     |
|              |               |                      |     |       |             |              |                |              |       |
| IL-6         | NM type       | SiO <sub>2</sub> NPs | 1   | −0.10 | −1.10,0.89  | 0.842        | -              | -            | R     |
|              |               | Graphene             | 1   | −1.84 | −3.04,−0.65 | 0.002        | -              | -            | R     |
|              |               | Mixed NMs            | 14  | 0.07  | −0.08,0.21  | 0.369        | 57.9           | 0.004        | R     |
|              |               | Carbon black         | 2   | 1.73  | 1.36,2.11   | <0.001       | 59.5           | 0.116        | R     |
|              |               | NPs                  |     |       |             |              |                |              |       |
|              | Sample source | TiO <sub>2</sub> NPs | 1   | 0.88  | 0.56,1.19   | <0.001       | -              | -            | R     |
|              |               | MWCNTs               | 1   | 6.36  | 4.22,8.51   | <0.001       | -              | -            | R     |
|              |               | Blood                | 19  | 0.22  | −0.07,0.52  | 0.142        | 91.7           | <0.001       | R     |
|              |               | Sputum               | 1   | 6.36  | 4.22,8.51   | <0.001       | -              | -            | R     |
|              |               |                      |     |       |             |              |                |              |       |
| IL-8         | NM type       | SiO <sub>2</sub> NPs | 1   | 0.05  | −0.95,1.04  | 0.930        | -              | -            | F     |
|              |               | Graphene             | 1   | −0.30 | −1.30,0.70  | 0.555        | -              | -            | F     |
|              |               | Mixed NMs            | 4   | −1.44 | −1.94,−0.93 | <0.001       | 18.5           | 0.298        | F     |
|              |               | Carbon black         | 2   | 0.58  | 0.38,0.79   | <0.001       | 0.0            | 0.948        | F     |
|              |               | NPs                  |     |       |             |              |                |              |       |
|              | Sample source | TiO <sub>2</sub> NPs | 1   | 0.87  | 0.55,1.19   | <0.001       | -              | -            | F     |
|              |               | MWCNTs               | 2   | 3.00  | 0.87,5.13   | 0.006        | 81.0           | 0.022        | R     |
|              |               | Blood                | 10  | −0.15 | −0.71,0.40  | 0.588        | 89.7           | <0.001       | R     |
|              |               | Sputum               | 1   | 4.17  | 2.63,5.71   | <0.001       | -              | -            | R     |
|              |               |                      |     |       |             |              |                |              |       |
| IL-10        | NM type       | TiO <sub>2</sub> NPs | 1   | 0.00  | −0.30,0.30  | 1.000        | -              | -            | F     |
|              |               | Carbon black         | 2   | −0.07 | −0.50,0.37  | 0.758        | 0.0            | 0.792        | F     |
|              |               | NPs                  |     |       |             |              |                |              |       |
|              |               | MWCNTs               | 1   | 3.99  | 2.50,5.48   | <0.001       | -              | -            | F     |

|                |         |                      |    |       |             |        |      |        |   |
|----------------|---------|----------------------|----|-------|-------------|--------|------|--------|---|
| TNF- $\alpha$  | Sample  | Blood                | 2  | 1.93  | -1.98,5.83  | 0.334  | 96.2 | <0.001 | R |
|                | source  | EBC                  | 2  | -0.07 | -0.50,0.37  | 0.758  | 0.0  | 0.792  | F |
|                | NM type | Mixed NMs            | 10 | 1.06  | 0.56,1.56   | <0.001 | 72.1 | <0.001 | R |
|                |         | Carbon black         | 2  | 1.99  | 1.74,2.24   | <0.001 | 0.0  | 0.519  | F |
|                |         | NPs                  |    |       |             |        |      |        |   |
|                |         | TiO <sub>2</sub> NPs | 1  | 0.72  | 0.40,1.03   | <0.001 | -    | -      | F |
|                |         | MWCNTs               | 2  | 5.04  | 3.78,6.30   | <0.001 | 0.0  | 0.517  | F |
|                |         | Sample               |    |       |             |        |      |        |   |
|                |         | Blood                | 8  | 1.50  | 0.81,2.18   | <0.001 | 91.5 | <0.001 | R |
|                |         | source               |    |       |             |        |      |        |   |
|                |         | Nasal lavage         | 4  | 1.25  | 0.34,2.16   | 0.007  | 75.2 | 0.007  | R |
| CC16           | NM type | EBC                  | 2  | 1.08  | 0.61,1.55   | <0.001 | 0.0  | 0.712  | F |
|                |         | Sputum               | 1  | 5.51  | 3.61,7.42   | <0.001 | -    | -      | F |
|                |         | MWCNTs               | 6  | -0.45 | -0.86,-0.04 | 0.032  | 60.2 | 0.028  | R |
|                |         | Mixed NMs            | 14 | -0.01 | -0.10,0.08  | 0.816  | 12.6 | 0.316  | F |
|                |         | TiO <sub>2</sub> NPs | 1  | -0.22 | -0.53,0.08  | 0.151  | -    | -      | F |
|                |         | SP-A                 |    |       |             |        |      |        |   |
| SP-A           | NM type | MWCNTs               | 6  | 0.07  | -0.33,0.46  | 0.740  | 0.0  | 0.734  | F |
|                |         | TiO <sub>2</sub> NPs | 1  | -0.13 | -0.43,0.18  | 0.415  | -    | -      | F |
| SP-D           | NM type | MWCNTs               | 6  | 0.20  | -0.20,0.60  | 0.332  | 47.2 | 0.092  | F |
|                |         | TiO <sub>2</sub> NPs | 1  | -0.23 | -0.54,0.07  | 0.130  | -    | -      | F |
| CRP            | NM type | Mixed NMs            | 16 | 0.05  | -0.04,0.14  | 0.284  | 36.0 | 0.075  | F |
|                |         | TiO <sub>2</sub> NPs | 1  | 0.24  | -0.07,0.54  | 0.127  | -    | -      | F |
|                |         | Carbon black         | 1  | 1.71  | 1.37,2.04   | <0.001 | -    | -      | F |
|                |         | NPs                  |    |       |             |        |      |        |   |
| NF- $\kappa$ B | Sample  | Blood                | 14 | -0.09 | -0.22,0.05  | 0.230  | 54.2 | 0.008  | R |
|                | source  | EBC                  | 14 | -0.01 | -0.16,0.14  | 0.936  | 61.7 | 0.001  | R |
| VCAM           | NM type | Mixed NMs            | 14 | 0.06  | -0.03,0.15  | 0.216  | 48.3 | 0.022  | F |
|                |         | TiO <sub>2</sub> NPs | 1  | 0.23  | -0.08,0.53  | 0.144  | -    | -      | F |
| ICAM           | NM type | Mixed NMs            | 14 | 0.15  | 0.01,0.28   | 0.031  | 52.3 | 0.012  | R |
|                |         | TiO <sub>2</sub> NPs | 1  | 0.47  | 0.16,0.77   | 0.003  | -    | -      | R |
|                |         | MWCNTs               | 6  | 1.52  | 0.94,2.10   | <0.001 | 38.5 | 0.150  | F |
| LT-B4          | NM type | Mixed NMs            | 2  | 0.44  | 0.01,0.88   | 0.048  | 0.0  | 0.834  | F |
|                |         | TiO <sub>2</sub> NPs | 5  | 3.32  | 1.21,5.43   | 0.002  | 97.3 | <0.001 | R |
|                |         | Sample               |    |       |             |        |      |        |   |
| LT-C4          | NM type | EBC                  | 5  | 3.81  | 1.38,6.24   | 0.002  | 97.3 | <0.001 | R |
|                |         | Urine                | 2  | -0.17 | -0.52,0.17  | 0.323  | 0.0  | 0.368  | F |
|                |         | Mixed NMs            | 2  | 0.08  | -0.35,0.52  | 0.703  | 0.0  | 0.838  | F |
|                |         | TiO <sub>2</sub> NPs | 5  | 1.76  | -0.13,3.64  | 0.068  | 97.2 | <0.001 | R |
| LT-D4          | NM type | Sample               |    |       |             |        |      |        |   |
|                |         | EBC                  | 5  | 2.11  | 0.26,3.97   | 0.026  | 96.4 | <0.001 | R |
|                |         | Urine                | 2  | -0.76 | -1.78,0.26  | 0.143  | 87.5 | 0.005  | R |
|                |         | Mixed NMs            | 2  | 0.20  | -0.24,0.63  | 0.370  | 0.0  | 0.486  | F |
| LT-E4          | NM type | TiO <sub>2</sub> NPs | 5  | 1.43  | -0.36,3.22  | 0.117  | 97.0 | <0.001 | R |
|                |         | Sample               |    |       |             |        |      |        |   |
|                |         | EBC                  | 5  | 1.82  | 0.48,3.16   | 0.008  | 93.6 | <0.001 | R |
|                |         | Urine                | 2  | -0.81 | -1.91,0.28  | 0.146  | 89.1 | 0.002  | R |
|                |         | Mixed NMs            | 2  | 0.50  | 0.06,0.94   | 0.025  | 0.0  | 0.938  | F |
|                |         | TiO <sub>2</sub> NPs | 5  | 2.17  | -0.06,4.40  | 0.056  | 97.0 | <0.001 | R |
|                |         | Sample               |    |       |             |        |      |        |   |
|                |         | EBC                  | 5  | 2.67  | 0.96,4.38   | 0.002  | 95.1 | <0.001 | R |

| source | Urine | 2 | -0.79 | -1.84,0.26 | 0.142 | 88.2 | 0.004 | R |
|--------|-------|---|-------|------------|-------|------|-------|---|
|--------|-------|---|-------|------------|-------|------|-------|---|

NMs, nanomaterials; NPs, nanoparticles; SiO<sub>2</sub>NPs, silica oxide nanoparticles; IONPs, iron oxide nanoparticles; TiO<sub>2</sub>NPs, titanium dioxide nanoparticles; ITONPs, indium tin oxide nanoparticles; MWCNTs, multi-walled carbon nanotubes; EBC: exhaled breath condensate; FENO, fraction of exhaled nitric oxide; IL, interleukin; TNF, tumor necrosis factor; NF- $\kappa$ B, nuclear factor kappa-B; CRP, C-reactive protein; CC16, club cell secretory protein 16; SP-A, surfactant protein A; SP-D, surfactant protein D; VCAM, vascular cell adhesion molecule; ICAM, intercellular adhesion molecule; LT-B<sub>4</sub>, leukotriene B<sub>4</sub>; LT-C<sub>4</sub>, leukotriene C<sub>4</sub>; LT-D<sub>4</sub>, leukotriene D<sub>4</sub>; LT-E<sub>4</sub>, leukotriene E<sub>4</sub>; SMD, standardized mean difference; CI, confidence interval; F, fixed-effects; R, random-effects;  $p_H$ -Value, significance for heterogeneity;  $p_A$ -Value, significance for associations.
